# Supplementary material for: Bacteria-derived ferrichrome inhibits tumor progression in sporadic colorectal neoplasms and colitis-associated cancer
Source: Research Square preprint supplement (doi:10.21203/rs.3.rs-17364/v2), 2020-11-13
Supplement: Supplementary file 1 [file d6a3830a5a6a7979343c6795.docx]

**Table 1.** Characteristics of the colorectal cancer cells

**Table 2.** Characteristics of the patient-derived adenoma and carcinoma organoids

**Table 3.** The growth suppression rate and fold change of ddit3 mRNA in ferrichrome-administered organoids
